# Supplementary material
Source: PubMed Central journal article supplement (PMC7676633)
Supplement: NIHMS1638436-supplement-SM1title.pdf [file NIHMS1638436-supplement-SM1title.pdf]

**Table S1. Recent approaches for integrative inference of context-specific gene regulatory networks**

| Fields                | Description                            | Notes                                                 |
|-----------------------|----------------------------------------|-------------------------------------------------------|
| Category              | Paper selection criteria               |                                                       |
| Author                | First author et al, year               |                                                       |
| Method name           | Name of the method, if available       |                                                       |
| Algorithm/Methodology | Algorithms                             |                                                       |
|                       | gene expression                        | mRNA expression or perturbation                       |
|                       | ChIP                                   | Use of TF ChIP-seq                                    |
|                       | Motif                                  | Use of TF motifs                                      |
| Data types            | Histone mark                           | Use of histone mark ChIP-seq                          |
|                       | Accessibility                          | Use of DNase-seq, ATAC-seq, DNA methylation           |
|                       | 3C                                     | Use of chromatin conformation capture (3C) techniques |
|                       | Prior                                  | Use of structure or parameter prior                   |
| Output                | Short description of the output result |                                                       |

| Category                                                                                       | Author                     | Method name (if designated) | Algorithm/Methodology                              | Data types         |      |       |              |                           |        |       | Output                                                           |
|------------------------------------------------------------------------------------------------|----------------------------|-----------------------------|----------------------------------------------------|--------------------|------|-------|--------------|---------------------------|--------|-------|------------------------------------------------------------------|
|                                                                                                |                            |                             |                                                    | gene expression    | ChIP | Motif | Histone mark | Accessibility             | 3C     | Prior |                                                                  |
| Integrating data to infer genome-scale context-specific transcriptional regulatory networks    | Ament et al., 2018         |                             | LASSO regression                                   | microarray RNA-seq |      | Y     |              | DNase-seq                 |        |       | GRN for HD in mouse                                              |
|                                                                                                | Chasman et al., 2019       | MERLIN-P                    | dependency network                                 | RNA-seq            |      | Y     |              | DNase-seq                 |        | Y     | GRN in human neuronal stem cell lineage                          |
|                                                                                                | Miraldi et al., 2019       | mLASSO-StARS                | dependency network                                 | RNA-seq            |      | Y     |              | ATAC-seq                  |        | Y     | GRN in human Th 17 cells                                         |
|                                                                                                | Mallm et al., 2019         |                             | Mutual Information (ARACNe-AP)                     | RNA-seq            | Y    | Y     | Y            | DNA methylation, ATAC-seq |        |       | GRN in human B-cells                                             |
|                                                                                                | Pearl et al., 2019         |                             | Pearson, LASSO regression                          | microarray         |      | Y     |              | DNase-seq                 |        |       | Human brain GRN                                                  |
|                                                                                                | Wang et al., 2018          | NetRex                      | linear model                                       | RNA-seq            |      |       |              |                           |        | Y     | Drosophila GRN                                                   |
|                                                                                                | Deng et al., 2018          | JRmGRN                      | Gaussian Graphical Model                           | RNA-seq            |      |       |              |                           |        |       | GRN in Arabidopsis in multiple conditions                        |
|                                                                                                | Tu et al., 2020            | NETI2                       | Gaussian Graphical Model                           | RNA-seq            |      |       |              |                           |        |       | A non-cancer network and multiple cancer networks                |
|                                                                                                | Zhou et al., 2020          | FSSEM                       | Structural Equation Model                          | RNA-seq            |      |       |              |                           |        |       | GRN under two conditions                                         |
|                                                                                                | Castro et al., 2019        | Inferelator-AMuSR           | regularized linear regression, multi-task learning | microarray         |      | Y     |              | ATAC-seq                  |        | Y     | GRN in Yeast and Bacteria                                        |
|                                                                                                | Osmanbeyoglu et al., 2019  | PSIONIC                     | multi-task learning                                | RNA-seq            |      | Y     |              | ATAC-seq                  |        |       | Tumor-specific GRN                                               |
| Data integration for predicting cis-regulatory elements controlling expression of target genes | Hait et al., 2018          | FOCS                        | elastic net regression                             | RNA-seq            |      |       |              | DNase-seq                 |        |       | enhancer-promoter interactions                                   |
|                                                                                                | Vijayabaskar et al., 2019  |                             | LASSO regression                                   | RNA-seq            | Y    |       | Y            | DNase-seq                 |        |       | cis-regulatory network                                           |
|                                                                                                | Tong et al., 2018          | MICMIC                      | Mutual Information                                 | RNA-seq            |      |       |              | DNA methylation           |        |       | cancer driver methylated region-target genes network             |
|                                                                                                | Fulco et al., 2019         | ABC model                   | Activity-by-contact                                | RNA-seq            |      |       | Y            | Dnase-seq                 | Hi-C   |       | enhancer-promoter interactions                                   |
|                                                                                                | Singh et al., 2019         | SPEID                       | deep neural net                                    |                    | Y    |       | Y            | DNase-seq                 | Hi-C   |       | enhancer-promoter interactions                                   |
|                                                                                                | Li et al., 2019            | DeepTACT                    | deep neural net                                    |                    |      |       |              | DNase-seq                 | PChI-C |       | enhancer-promoter interactions                                   |
|                                                                                                | Talukder et al., 2019      | EPIP                        | AdaBoost                                           |                    | Y    |       | Y            | DNase-seq                 | Hi-C   |       | enhancer-promoter interactions                                   |
|                                                                                                | Zhang et al., 2019         | HiC-Reg                     | random forest regression                           |                    | Y    | Y     | Y            | DNase-seq                 | Hi-C   |       | Hi-C contact counts                                              |
| Methods to learn regulatory networks from single cell omic data types                          | Belokopytova et al., 2020  | 3DPredictor                 | Gradient boosting                                  | RNA-seq            | Y    | Y     |              |                           | Hi-C   |       | Hi-C contact counts                                              |
|                                                                                                | González-Bias et al., 2020 | ScoMAP                      | dependency network, LDA, random forest regression  | scRNA-seq          |      | Y     |              | scATAC-seq                |        |       | enhancer-gene networks, scATAC-seq, scRNA-seq cell clusters, GRN |
|                                                                                                | Jansen et al., 2019        | SOMatic                     | Self-organizing maps                               | scRNA-seq          | Y    | Y     |              | scATAC-seq                |        |       | scATAC-seq, scRNA-seq cell clusters, GRN                         |
|                                                                                                | Zeng et al., 2019          | DC3                         | Matrix factorization                               | scRNA-seq          |      | Y     |              | scATAC-seq                | HiChIP |       | single cell population-specific network                          |
